# Supplementary material for: The Spread of Bluetongue Virus Serotype 8 in Great Britain and Its Control by Vaccination
Source: PubMed Central journal article supplement (PMC2825270; doi:10.1371/journal.pone.0009353), 2010-02-22
Supplement: pone.0009353.s001.pdf [file pone.0009353.s001.pdf]

**Table S1.** Full list of scenarios considered for the spread and control of bluetongue virus (BTV) serotype 8 in Great Britain (GB).

| scenario | vaccine uptake (%)    | reduced uptake in cattle? | temperature data-set | time to full protection in cattle (dpv) | vaccine efficacy (%) | kernel shape | kernel parameter(s) <sup>‡</sup> |
|----------|-----------------------|---------------------------|----------------------|-----------------------------------------|----------------------|--------------|----------------------------------|
| 1        | none                  | no                        | 2007                 | 60                                      | 100                  | Gaussian     | MLE                              |
| 2        | 95                    | no                        | 2007                 | 60                                      | 100                  | Gaussian     | MLE                              |
| 3        | 80                    | no                        | 2007                 | 60                                      | 100                  | Gaussian     | MLE                              |
| 4        | 50                    | no                        | 2007                 | 60                                      | 100                  | Gaussian     | MLE                              |
| 5        | variable <sup>†</sup> | no                        | 2007                 | 60                                      | 100                  | Gaussian     | MLE                              |
| 6        | 95                    | yes*                      | 2007                 | 60                                      | 100                  | Gaussian     | MLE                              |
| 7        | 80                    | yes*                      | 2007                 | 60                                      | 100                  | Gaussian     | MLE                              |
| 8        | 50                    | yes*                      | 2007                 | 60                                      | 100                  | Gaussian     | MLE                              |
| 9        | variable <sup>†</sup> | yes*                      | 2007                 | 60                                      | 100                  | Gaussian     | MLE                              |
| 10       | none                  | no                        | 2006                 | 60                                      | 100                  | Gaussian     | MLE                              |
| 11       | 95                    | no                        | 2006                 | 60                                      | 100                  | Gaussian     | MLE                              |
| 12       | 80                    | no                        | 2006                 | 60                                      | 100                  | Gaussian     | MLE                              |
| 13       | 50                    | no                        | 2006                 | 60                                      | 100                  | Gaussian     | MLE                              |
| 14       | variable <sup>†</sup> | no                        | 2006                 | 60                                      | 100                  | Gaussian     | MLE                              |
| 15       | 95                    | yes*                      | 2006                 | 60                                      | 100                  | Gaussian     | MLE                              |
| 16       | 80                    | yes*                      | 2006                 | 60                                      | 100                  | Gaussian     | MLE                              |
| 17       | 50                    | yes*                      | 2006                 | 60                                      | 100                  | Gaussian     | MLE                              |
| 18       | variable <sup>†</sup> | yes*                      | 2006                 | 60                                      | 100                  | Gaussian     | MLE                              |
| 19       | variable <sup>†</sup> | no                        | 2007                 | 30                                      | 100                  | Gaussian     | MLE                              |
| 20       | variable <sup>†</sup> | no                        | 2007                 | 45                                      | 100                  | Gaussian     | MLE                              |
| 21       | variable <sup>†</sup> | no                        | 2007                 | 60                                      | 50                   | Gaussian     | MLE                              |
| 22       | variable <sup>†</sup> | no                        | 2007                 | 60                                      | 60                   | Gaussian     | MLE                              |
| 23       | variable <sup>†</sup> | no                        | 2007                 | 60                                      | 70                   | Gaussian     | MLE                              |
| 24       | variable <sup>†</sup> | no                        | 2007                 | 60                                      | 80                   | Gaussian     | MLE                              |
| 25       | variable <sup>†</sup> | no                        | 2007                 | 60                                      | 90                   | Gaussian     | MLE                              |
| 26       | variable <sup>†</sup> | no                        | 2007                 | 60                                      | 100                  | Gaussian     | 0.005                            |
| 27       | variable <sup>†</sup> | no                        | 2007                 | 60                                      | 100                  | Gaussian     | 0.01                             |

| scenario | vaccine uptake (%)    | reduced uptake in cattle? | temperature data-set | time to full protection in cattle (dpv) | vaccine efficacy (%) | kernel shape | kernel parameter(s) <sup>‡</sup> |
|----------|-----------------------|---------------------------|----------------------|-----------------------------------------|----------------------|--------------|----------------------------------|
| 28       | variable <sup>†</sup> | no                        | 2007                 | 60                                      | 100                  | Gaussian     | 0.05                             |
| 29       | variable <sup>†</sup> | no                        | 2007                 | 60                                      | 100                  | Gaussian     | 0.1                              |
| 30       | variable <sup>†</sup> | no                        | 2007                 | 60                                      | 100                  | Gaussian     | 0.2                              |
| 31       | variable <sup>†</sup> | no                        | 2007                 | 60                                      | 100                  | exponential  | MLE                              |
| 32       | variable <sup>†</sup> | no                        | 2007                 | 60                                      | 100                  | fat-tailed   | MLE                              |
| 33       | variable <sup>†</sup> | no                        | 2007                 | 60                                      | 100                  | FMD          | MLE                              |

<sup>†</sup> variable uptake: 50% in free area; 75% in surveillance zone; and 95% in protection zone, as defined by Defra at the end of 2007 (see table 1 in the main paper)

\* uptake by cattle-only farms is 10% lower than by other farm types (i.e. sheep-only or mixed cattle and sheep farms; see table 1 in the main paper)

<sup>‡</sup> MLE: kernel parameters are the maximum likelihood estimates based on fitting to data on the north European outbreak of BTV in 2006 (Gaussian, exponential, fat-tailed; see Szymaragd et al. 2009 *PLoS ONE* **4**, e7741) or to the 2001 epidemic of foot-and-mouth disease (FMD) in GB (see Chis Ster & Ferguson 2007 *PLoS ONE* **2**, e502; Chis Ster et al. 2009 *Epidemics* **1**, 21-34).
